# Supplementary material for: Oral Anticoagulant Use and Appropriateness in Elderly Patients with Atrial Fibrillation in Complex Clinical Conditions: ACONVENIENCE Study
Source: MDPI journal article supplement (doi:10.3390/jcm11247423), 2022-12-14
Supplement: s1 [file s1]

Supplementary Materials

**Figure S1:** Percentage of agreement on Delphi-type questionnaire statements on oral anticoagulation in elderly patients (>75 years) with NVAf that did not reach consensus.

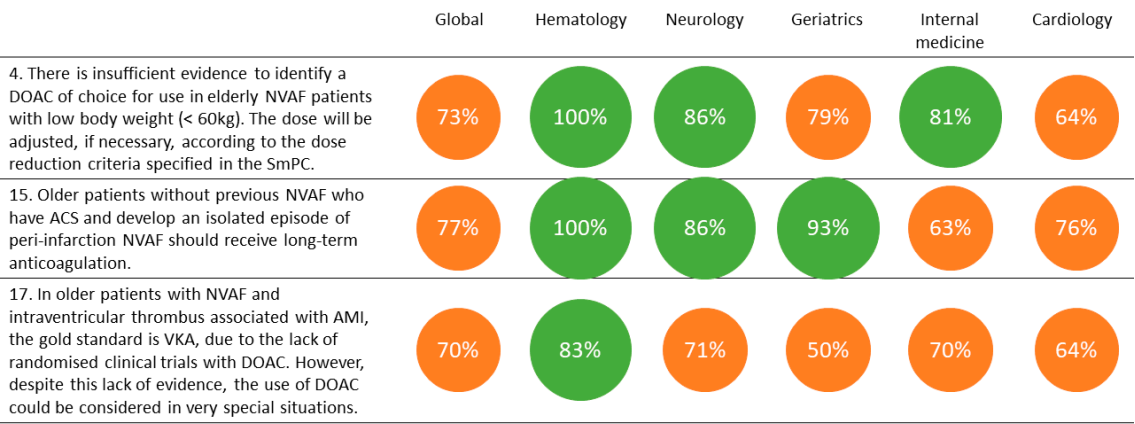

DOAC, direct-acting oral anticoagulant; NVAf, non-valvular atrial fibrillation; ACS, acute coronary syndrome; AMI, acute myocardial infarction; VKA, vitamin K antagonists.
